1  
2  
3  
4  
5  
6  
7  
8  
9  
10  
11  
12  
13  
14  
15  
16  
17  
18  
19  
20  
21

## **Molecular analysis of a public cross-neutralizing antibody response to SARS-CoV-2**

Meng Yuan<sup>1</sup>, Yiquan Wang<sup>2</sup>, Huibin Lv<sup>2,3</sup>, Ian A. Wilson<sup>1,4</sup>, Nicholas C. Wu<sup>1,5,6,7,§</sup>

<sup>1</sup> Department of Integrative Structural and Computational Biology, The Scripps Research Institute, La Jolla, CA 92037, USA

<sup>2</sup> Department of Biochemistry, University of Illinois at Urbana-Champaign, Urbana, IL 61801, USA

<sup>3</sup> HKU-Pasteur Research Pole, School of Public Health, Li Ka Shing Faculty of Medicine, The University of Hong Kong, Hong Kong SAR, China

<sup>4</sup> The Skaggs Institute for Chemical Biology, The Scripps Research Institute, La Jolla, CA 92037, USA

<sup>5</sup> Center for Biophysics and Quantitative Biology, University of Illinois at Urbana-Champaign, Urbana, IL 61801, USA

<sup>6</sup> Carl R. Woese Institute for Genomic Biology, University of Illinois at Urbana-Champaign, Urbana, IL 61801, USA

<sup>7</sup> Carle Illinois College of Medicine, University of Illinois at Urbana-Champaign, Urbana, IL 61801, USA

§ Correspondence: [nicwu@illinois.edu](mailto:nicwu@illinois.edu) (N.C.W.)

22 **ABSTRACT**

23 As SARS-CoV-2 variants of concerns (VOCs) continue to emerge, cross-neutralizing antibody  
24 responses become key towards next-generation design of a more universal COVID-19 vaccine.  
25 By analyzing published data from the literature, we report here that the combination of germline  
26 genes IGHV2-5/IGLV2-14 represents a public antibody response to the receptor-binding domain  
27 (RBD) that potently cross-neutralizes all VOCs to date, including Omicron and its sub-lineages.  
28 Detailed molecular analysis shows that the complementarity-determining region H3 sequences of  
29 IGHV2-5/IGLV2-14-encoded RBD antibodies have a preferred length of 11 amino acids and a  
30 conserved HxIxxI motif. In addition, these antibodies have a strong allelic preference due to an  
31 allelic polymorphism at amino-acid residue 54 of IGHV2-5, which locates at the paratope. These  
32 findings have important implications for understanding cross-neutralizing antibody responses to  
33 SARS-CoV-2 and its heterogeneity at the population level as well as the development of a  
34 universal COVID-19 vaccine.

35 **MAIN**

36 The effectiveness of COVID-19 vaccines has been challenged by the evolution of diverse SARS-  
37 CoV-2 variants in the past two years. The recent emergence of Omicron and its sub-lineages  
38 BA.2, BA.2.12.1, BA.4, and BA.5 further highlights the urgent need for a more broadly protective  
39 vaccine. An ideal COVID-19 vaccine should elicit high titers of neutralizing antibodies that are  
40 potent against antigenically distinct variants. However, many potent neutralizing antibodies only  
41 have limited cross-reactivity for variants other than the immunizing strain. For example, a major  
42 class of antibodies to the receptor-binding domain (RBD) that are encoded by IGHV3-53/3-66 are  
43 highly potent against the ancestral Hu-1 strain, but most of them lose their activity against many  
44 other variants [1, 2]. Similarly, Beta-specific antibodies can be elicited without cross-neutralizing  
45 activity against ancestral or other variants [3]. On the other hand, antibodies to S2 are typically  
46 broadly reactive but have weak neutralizing activity [4-6]. Nevertheless, a few RBD antibodies  
47 exhibit marked neutralization potency and breadth, as exemplified by those to the RBS-D epitope  
48 [2].

49  
50 One representative RBS-D antibody is LY-CoV1404 (also known as Bebtelovimab), which is a  
51 monoclonal therapeutic antibody from Eli Lilly. LY-CoV1404 is encoded by IGHV2-5/IGLV2-14  
52 and can cross-neutralize the ancestral Hu-1 strain as well as all known variants of concern (VOCs),  
53 including Omicron and circulating sub-lineages [7, 8]. In fact, the binding mode of LY-CoV1404 is  
54 identical to the cross-neutralizing antibody 2-7, which is also encoded by IGHV2-5/IGLV2-14 [9].  
55 More recently, Veessler and colleagues reported another potently cross-neutralizing antibody with  
56 similar sequences and binding mode as LY-CoV1404 [10]. As IGHV2-5 was shown to be an  
57 important contributor to cross-neutralizing antibody response [11], the observations above  
58 stimulated a systematic analysis of IGHV2-5/IGLV2-14-encoded RBD antibodies to SARS-CoV-  
59 2.

60

61 In our previous study, we assembled a dataset of ~8,000 antibodies to SARS-CoV-2 spike (S)  
62 protein [12]. This dataset contains seven IGHV2-5/IGLV2-14-encoded RBD antibodies, including  
63 LY-CoV1404, from six different donors [7, 13-17]. In addition, four additional IGHV2-5/IGLV2-14-  
64 encoded RBD antibodies were reported in a recent study [18]. Our analysis here is therefore  
65 based on a total of 11 IGHV2-5/IGLV2-14-encoded RBD antibodies from at least seven donors.  
66 Three of these 11 antibodies have available information for the complete nucleotide sequence,  
67 nine have complete amino-acid sequence information, 10 have amino-acid sequence information  
68 for the complementarity-determining regions (CDRs) H3 and L3, and four have structure  
69 information. Neutralizing data from previous studies have demonstrated that these IGHV2-  
70 5/IGLV2-14-encoded RBD antibodies have high cross-neutralizing activity [7, 18-20], some of  
71 which remain potent against Omicron (**Figure 1A**). Previous studies have also shown that they  
72 compete with ACE2 for RBD binding [7, 18, 20, 21] (**Figure S1**).

73  
74 Next, we performed a structural analysis to uncover the sequence determinants of IGHV2-  
75 5/IGLV2-14-encoded antibodies for RBD engagement. For antibody residues, the Kabat  
76 numbering scheme is used unless otherwise stated. All four IGHV2-5/IGLV2-14-encoded RBD  
77 antibodies with available structural information exhibit the same binding mode to the RBD (**Figure**  
78 **1B**). As observed in LY-CoV1404, most amino-acid side chains in the paratope are germline-  
79 encoded and form key interactions with the RBD (**Figure 1C**). For example, germline-encoded  $V_H$   
80 S32 in the CDR H1 fits into a polar pocket in the RBD. In addition, germline-encoded  $V_H$  Y52, D54,  
81 D56, and R58 in the CDR H2 form an extensive network of H-bonds and electrostatic interactions  
82 with the RBD. Furthermore, two key paratope residues in the light chain  $V_L$  Y32 and Y91 are also  
83 germline-encoded. These observations demonstrate that the RBD-binding determinants are  
84 encoded in the germline sequences of IGHV2-5 and IGLV2-14. Consistently, several IGHV2-  
85 5/IGLV2-14-encoded RBD antibodies have very few somatic hypermutations (SHMs) (**Table S1**).

86 For example, S24-223 has only one SHM, and COV2-2268 and 2-7 have only four each. Of note,  
87 none of their SHMs overlap.

88

89 Additional sequence analysis indicated that IGHV2-5/IGLV2-14-encoded RBD antibodies had a  
90 strong allelic preference towards IGHV2-5\*02. Eight out of 11 IGHV2-5/IGLV2-14-encoded RBD  
91 antibodies could be assigned to IGHV2-5\*02, while the allele usage for the other three was  
92 ambiguous (**Figure 1D and Table S1**). In contrast, analysis of the B cell repertoire in 13 healthy  
93 donors [22, 23] showed that alleles IGHV2-5\*01 and IGHV2-5\*02 were both commonly used, with  
94 a frequency of 33% and 64%, respectively, among all IGHV2-5 antibodies (**Figure 1D and Table**  
95 **S2**). The lack of IGHV2-5\*01 among IGHV2-5/IGLV2-14-encoded RBD antibodies is likely due to  
96 an allelic polymorphism at residue 54. IGHV2-5\*01 and IGHV2-5\*02 have Asn and Asp,  
97 respectively, at residue 54. V<sub>H</sub> D54 in IGHV2-5/IGLV2-14-encoded RBD antibodies plays an  
98 important role in RBD binding through a salt bridge with RBD K444 and an H-bond with RBD  
99 N450 (**Figure 1C**). Replacing the Asp at V<sub>H</sub> residue 54 by Asn would convert the salt bridge with  
100 RBD K444 to a H-bond, which would likely significantly weaken the binding energy. Consistently,  
101 all eight of the nine IGHV2-5/IGLV2-14-encoded RBD antibodies with sequence information  
102 available have an Asp at V<sub>H</sub> residue 54, whereas the remaining one has a Glu at V<sub>H</sub> residue 54  
103 (**Table S1**). These findings provide a mechanistic basis for the allelic preference against IGHV2-  
104 5\*01, despite its prevalence in the human population. Coincidentally, an almost identical  
105 observation was observed in an IGHV2-5-encoded HIV antibody, in which V<sub>H</sub> D54 results in much  
106 stronger binding than V<sub>H</sub> N54 [24].

107

108 Lastly, we analyzed the CDR H3 sequences of the IGHV2-5/IGLV2-14-encoded RBD antibodies.  
109 Among 10 IGHV2-5/IGLV2-14-encoded RBD antibodies with CDR H3 sequence information  
110 available, eight had a CDR H3 length of 11 amino acids (IMGT numbering) and came from at  
111 least five patients (**Figure 2A**). The CDR H3 sequences from these eight antibodies shared a

112 motif HxLxxI or conserved variations of it, including HxLxxL and HxVxxI (**Figures 2A and 2B**). The  
113 HxLxxI motif consisted of V<sub>H</sub> H95, I97, and I100 (Kabat numbering) and is uncommon among the  
114 CDR H3 sequences of IGHV2-5-encoded antibodies in the human antibody repertoire (**Figure**  
115 **2B**). V<sub>H</sub> H95, I97, and I100 in the HxLxxI motif play critical roles in stabilizing the loop conformation  
116 as well as RBD binding (**Figure 2C**). V<sub>H</sub> H95 forms two intramolecular H-bonds to stabilize the  
117 CDR H3 loop. The first H-bond involves the side chain of V<sub>H</sub> Y52, which in turn H-bonds with RBD  
118 V445 amide nitrogen. The second H-bond involves the backbone carbonyl of V<sub>H</sub> I100. In addition,  
119 V<sub>H</sub> H95 also forms van der Waals interaction with RBD V445. V<sub>H</sub> I97 at the tip of the CDR H3 loop  
120 inserts into a hydrophobic pocket formed by RBD V445 and P499, as well as the aliphatic portion  
121 of RBD N440. V<sub>H</sub> I100 helps position V<sub>L</sub> Y91 to interact with RBD V445 and P499. As shown by  
122 IgBlast analysis [25], the HxLxxI motif is largely encoded by N-nucleotide addition, although V<sub>H</sub>  
123 I97 may sometimes be encoded by an IGHD gene (**Figure 2D**). Of note, while CDR H3 of XG005  
124 has 12 amino acids (**Figure 2A**), it adopts a similar conformation to those with 11 amino acids  
125 (**Figure S2**). Overall, IGHV2-5/IGLV2-14-encoded RBD antibodies with a CDR H3 length of 11  
126 amino acids have convergent CDR H3 sequences, and thus can be classified as a public  
127 clonotype.

128  
129 Due to the continuous evolution of SARS-CoV-2 VOCs, identification of cross-neutralizing human  
130 monoclonal antibodies has been a global research focus. IGHV1-58/IGKV3-20-encoded RBD  
131 antibodies are perhaps the most well-characterized public antibody clonotype that is cross-  
132 neutralizing against multiple SARS-CoV-2 VOCs [3, 12, 26-29]. However, recent studies have  
133 shown that many IGHV1-58/IGKV3-20-encoded RBD antibodies have minimal neutralizing  
134 activity against Omicron and its sub-lineages due to mutations Q493R and F486V on the RBD  
135 [30-32]. In comparison, IGHV2-5/IGLV2-14-encoded RBD antibodies, which mostly retain  
136 potency against Omicron and its sub-lineages (**Figure 1A**) [7, 8, 18-20, 33], have higher  
137 neutralization breadth. Since IGHV2-5/IGLV2-14-encoded RBD antibodies are also a public

138 antibody clonotype, they further substantiate the rationale and strategy for development of a more  
139 universal COVID-19 vaccine.

140

141 Nevertheless, some individuals may have difficulties generating an IGHV2-5/IGLV2-14-encoded  
142 RBD antibody response, due to the alleles that they possess (**Figure 1D**). Since there is no known  
143 copy number variation for IGHV2-5 [34], each person should carry two copies of IGHV2-5 in the  
144 genome. If both copies are IGHV2-5\*01 allele, the person may not have the suitable B cell  
145 germline clone to produce a IGHV2-5/IGLV2-14-encoded RBD antibody response. In fact, donor  
146 112 in the 13 healthy donors that were analyzed in this study is very likely to be IGHV2-5\*01  
147 homozygous, since 94% of its IGHV2-5-encoded antibodies were assigned to IGHV2-5\*01 (**Table**  
148 **S2**). Moreover, the conserved HxLxxI motif in CDR H3 of IGHV2-5/IGLV2-14-encoded RBD  
149 antibodies is mostly encoded by random N-nucleotide addition. As a result, B cell germline clones  
150 that can produce IGHV2-5/IGLV2-14-encoded RBD antibodies may be relatively rare. These  
151 results may provide a genetic basis for heterogeneity in the cross-neutralizing antibody response  
152 among different individuals. While allelic preference has previously been described for  
153 neutralizing antibodies to other viruses [24, 35-37], its clinical implications for COVID-19 remain  
154 to be fully explored.

## 155 **MATERIALS AND METHODS**

### 156 **Dataset collection**

157 The information on antibodies S24-223, P2B-1E4, 2-7, LY-CoV1404, XG005, XG031, and COV2-  
158 2268 were compiled in our previous study [12], whereas the information on XGv042, XGv264,  
159 XGv265, and XGv266 were compiled in CoV-AbDab [38]. Neutralization data of each monoclonal  
160 antibody were collected from the original papers (**Table S1**). Somatic hypermutations were  
161 identified by IgBlast [25].

162

### 163 **Allele assignment of IGHV2-5/IGLV2-14-encoded RBD antibodies**

164 For antibodies P2B-1E4, XG005, and XG031, the allele information was obtained from the original  
165 publications [14, 16]. For other antibodies, IgBlast was used to assign the allele of each antibody  
166 [25]. Nucleotide sequence, if available, was used as input for IgBlast. Otherwise, protein  
167 sequence was used. If an antibody showed equally likely to be encoded by two or more alleles,  
168 the allele assignment would be classified as “ambiguous”. All “ambiguous” allele assignments in  
169 this study came from antibodies that do not have nucleotide sequence information available,  
170 namely XGv264, XGv265, and XGv266. Of note, while IgBlast showed that XGv266 was equally  
171 likely to be encoded by IGHV2-5\*01 and IGHV2-5\*02, we postulated that XGv266 should be  
172 assigned to IGHV2-5\*02 at the nucleotide level. Specifically, XGv266 had a Glu at V<sub>H</sub> residue 54,  
173 which was one nucleotide change from the Asp codon used (IGHV2-5\*02) but two nucleotides  
174 away from Asn (IGHV2-5\*01). However, IgBlast did not utilize codon information for allele  
175 assignment when the amino-acid sequence was used as input.

176

### 177 **Analysis of allele usage in published antibody repertoire**

178 Published antibody repertoire sequencing datasets from 13 healthy donors [22, 23] were  
179 downloaded from cAb-Rep [39]. Putative germline gene alleles for each antibody sequence in  
180 these repertoire sequencing datasets from healthy donors were identified by IgBLAST [25].



181

## 182 **Analysis of CDR H3 sequences**

183 Sequence alignment was performed using MAFFT [40]. Antibody sequences in the human  
184 antibody repertoire were downloaded from the Observed Antibody Space [41]. IGHV2-5  
185 antibodies as well as their CDR H3 sequences were identified using IgBLAST [25]. Sequence  
186 logos were generated by WebLogo [42]. Putative germline sequences and segments in the V-D-  
187 J junctions were identified by IgBLAST [25].

188

## 189 **Code Availability**

190 Custom codes for all analyses have been deposited to [https://github.com/nicwulab/IGHV2-](https://github.com/nicwulab/IGHV2-5_RBD_Abs)  
191 [5\\_RBD\\_Abs](#).

192

## 193 **ACKNOWLEDGEMENTS**

194 This work was supported by National Institutes of Health (NIH) DP2 AT011966 (N.C.W.), R01  
195 AI167910 (N.C.W.), the Michelson Prizes for Human Immunology and Vaccine Research  
196 (N.C.W.), Bill and Melinda Gates Foundation INV-004923 (I.A.W.), and a Calmette and Yersin  
197 scholarship from the Pasteur International Network Association (H.L.).

198

## 199 **AUTHOR CONTRIBUTIONS**

200 M.Y. and N.C.W. conceived and designed the study. All authors performed data analysis. M.Y.  
201 and N.C.W. wrote the paper and all authors reviewed and/or edited the paper.

202

## 203 **COMPETING INTERESTS**

204 The authors declare no competing interests.

## 205 REFERENCES

- 206 1. Zhang Q, *et al.* Potent and protective IGHV3-53/3-66 public antibodies and their shared  
207 escape mutant on the spike of SARS-CoV-2. *Nat Commun* **12**, 4210 (2021)
- 208 2. Yuan M, *et al.* Structural and functional ramifications of antigenic drift in recent SARS-  
209 CoV-2 variants. *Science* **373**, 818-823 (2021)
- 210 3. Reincke SM, *et al.* SARS-CoV-2 Beta variant infection elicits potent lineage-specific and  
211 cross-reactive antibodies. *Science* **375**, 782-787 (2022)
- 212 4. Zhou P, *et al.* A human antibody reveals a conserved site on beta-coronavirus spike  
213 proteins and confers protection against SARS-CoV-2 infection. *Sci Transl Med* **14**,  
214 eabi9215 (2022)
- 215 5. Pinto D, *et al.* Broad betacoronavirus neutralization by a stem helix-specific human  
216 antibody. *Science* **373**, 1109-1116 (2021)
- 217 6. Li W, *et al.* Structural basis and mode of action for two broadly neutralizing antibodies  
218 against SARS-CoV-2 emerging variants of concern. *Cell Rep* **38**, 110210 (2022)
- 219 7. Westendorf K, *et al.* LY-CoV1404 (bebtelovimab) potently neutralizes SARS-CoV-2  
220 variants. *Cell Reports* **39**, 110812 (2022)
- 221 8. Cao Y, *et al.* BA.2.12.1, BA.4 and BA.5 escape antibodies elicited by Omicron infection.  
222 *bioRxiv*, doi: 10.1101/2022.04.30.489997, (2022)
- 223 9. Kramer KJ, *et al.* Potent neutralization of SARS-CoV-2 variants of concern by an  
224 antibody with an uncommon genetic signature and structural mode of spike recognition.  
225 *Cell Rep* **37**, 109784 (2021)
- 226 10. Park YJ, *et al.* Imprinted antibody responses against SARS-CoV-2 Omicron sublineages.  
227 *bioRxiv*, doi: 10.1101/2022.05.08.491108, (2022)
- 228 11. Andreano E, *et al.* Hybrid immunity improves B cells and antibodies against SARS-CoV-  
229 2 variants. *Nature* **600**, 530-535 (2021)
- 230 12. Wang Y, *et al.* A large-scale systematic survey reveals recurring molecular features of  
231 public antibody responses to SARS-CoV-2. *Immunity*, doi:  
232 10.1016/j.immuni.2022.03.019, (2022)
- 233 13. Dugan HL, *et al.* Profiling B cell immunodominance after SARS-CoV-2 infection reveals  
234 antibody evolution to non-neutralizing viral targets. *Immunity* **54**, 1290-1303.e1297  
235 (2021)
- 236 14. Ju B, *et al.* Human neutralizing antibodies elicited by SARS-CoV-2 infection. *Nature* **584**,  
237 115-119 (2020)
- 238 15. Liu L, *et al.* Potent neutralizing antibodies directed to multiple epitopes on SARS-CoV-2  
239 spike. *Nature* **584**, 450-456 (2020)

- 240 16. Zhou Y, *et al.* Enhancement versus neutralization by SARS-CoV-2 antibodies from a  
241 convalescent donor associates with distinct epitopes on the RBD. *Cell Rep* **34**, 108699  
242 (2021)
- 243 17. Zost SJ, *et al.* Rapid isolation and profiling of a diverse panel of human monoclonal  
244 antibodies targeting the SARS-CoV-2 spike protein. *Nat Med* **26**, 1422-1427 (2020)
- 245 18. Wang K, *et al.* Memory B cell repertoire from triple vaccinees against diverse SARS-  
246 CoV-2 variants. *Nature* **603**, 919-925 (2022)
- 247 19. Liu L, *et al.* Striking antibody evasion manifested by the Omicron variant of SARS-CoV-  
248 2. *Nature* **602**, 676-681 (2022)
- 249 20. Liu Z, *et al.* An ultrapotent pan- $\beta$ -coronavirus lineage B ( $\beta$ -CoV-B) neutralizing antibody  
250 locks the receptor-binding domain in closed conformation by targeting its conserved  
251 epitope. *Protein Cell*, doi: 10.1007/s13238-021-00871-6, (2021)
- 252 21. Cerutti G, *et al.* Structural basis for accommodation of emerging B.1.351 and B.1.1.7  
253 variants by two potent SARS-CoV-2 neutralizing antibodies. *Structure* **29**, 655-663.e654  
254 (2021)
- 255 22. Briney B, Inderbitzin A, Joyce C, Burton DR. Commonality despite exceptional diversity  
256 in the baseline human antibody repertoire. *Nature* **566**, 393-397 (2019)
- 257 23. Soto C, *et al.* High frequency of shared clonotypes in human B cell receptor repertoires.  
258 *Nature* **566**, 398-402 (2019)
- 259 24. Alam SM, *et al.* Differential reactivity of germ line allelic variants of a broadly neutralizing  
260 HIV-1 antibody to a gp41 fusion intermediate conformation. *J Virol* **85**, 11725-11731  
261 (2011)
- 262 25. Ye J, Ma N, Madden TL, Ostell JM. IgBLAST: an immunoglobulin variable domain  
263 sequence analysis tool. *Nucleic Acids Res* **41**, W34-40 (2013)
- 264 26. Dejnirattisai W, *et al.* The antigenic anatomy of SARS-CoV-2 receptor binding domain.  
265 *Cell* **184**, 2183-2200.e2122 (2021)
- 266 27. Robbiani DF, *et al.* Convergent antibody responses to SARS-CoV-2 in convalescent  
267 individuals. *Nature* **584**, 437-442 (2020)
- 268 28. Tortorici MA, *et al.* Ultrapotent human antibodies protect against SARS-CoV-2 challenge  
269 via multiple mechanisms. *Science* **370**, 950-957 (2020)
- 270 29. Wang L, *et al.* Ultrapotent antibodies against diverse and highly transmissible SARS-  
271 CoV-2 variants. *Science* **373**, eabh1766 (2021)
- 272 30. Dong J, *et al.* Genetic and structural basis for SARS-CoV-2 variant neutralization by a  
273 two-antibody cocktail. *Nat Microbiol* **6**, 1233-1244 (2021)
- 274 31. Starr TN, *et al.* SARS-CoV-2 RBD antibodies that maximize breadth and resistance to  
275 escape. *Nature* **597**, 97-102 (2021)

- 276 32. FDA. Fact sheet for healthcare providers: emergency use authorization for Evusheld  
277 (tixagevimab co-packaged with cilgavimab). doi, (2021)
- 278 33. Yamasoba D, *et al.* Sensitivity of novel SARS-CoV-2 Omicron subvariants, BA.2.11,  
279 BA.2.12.1, BA.4 and BA.5 to therapeutic monoclonal antibodies. *bioRxiv*, doi:  
280 10.1101/2022.05.03.490409, (2022)
- 281 34. Lefranc MP, Lefranc G. Immunoglobulins or antibodies: IMGT bridging genes, structures  
282 and functions. *Biomedicines* **8**, 319 (2020)
- 283 35. Ying T, *et al.* Junctional and allele-specific residues are critical for MERS-CoV  
284 neutralization by an exceptionally potent germline-like antibody. *Nat Commun* **6**, 8223  
285 (2015)
- 286 36. Lang S, *et al.* Antibody 27F3 broadly targets influenza A group 1 and 2 hemagglutinins  
287 through a further variation in V<sub>H</sub>1-69 antibody orientation on the HA stem. *Cell Rep* **20**,  
288 2935-2943 (2017)
- 289 37. Avnir Y, *et al.* IGHV1-69 polymorphism modulates anti-influenza antibody repertoires,  
290 correlates with IGHV utilization shifts and varies by ethnicity. *Sci Rep* **6**, 20842 (2016)
- 291 38. Raybould MIJ, Kovaltsuk A, Marks C, Deane CM. CoV-AbDab: the coronavirus antibody  
292 database. *Bioinformatics* **37**, 734-735 (2021)
- 293 39. Guo Y, *et al.* cAb-Rep: a database of curated antibody repertoires for exploring antibody  
294 diversity and predicting antibody prevalence. *Front Immunol* **10**, 2365 (2019)
- 295 40. Katoh K, Standley DM. MAFFT multiple sequence alignment software version 7:  
296 improvements in performance and usability. *Mol Biol Evol* **30**, 772-780 (2013)
- 297 41. Kovaltsuk A, *et al.* Observed Antibody Space: a resource for data mining next-  
298 generation sequencing of antibody repertoires. *J Immunol* **201**, 2502-2509 (2018)
- 299 42. Crooks GE, Hon G, Chandonia JM, Brenner SE. WebLogo: a sequence logo generator.  
300 *Genome Res* **14**, 1188-1190 (2004)
- 301 43. Lan J, *et al.* Structure of the SARS-CoV-2 spike receptor-binding domain bound to the  
302 ACE2 receptor. *Nature* **581**, 215-220 (2020)  
303

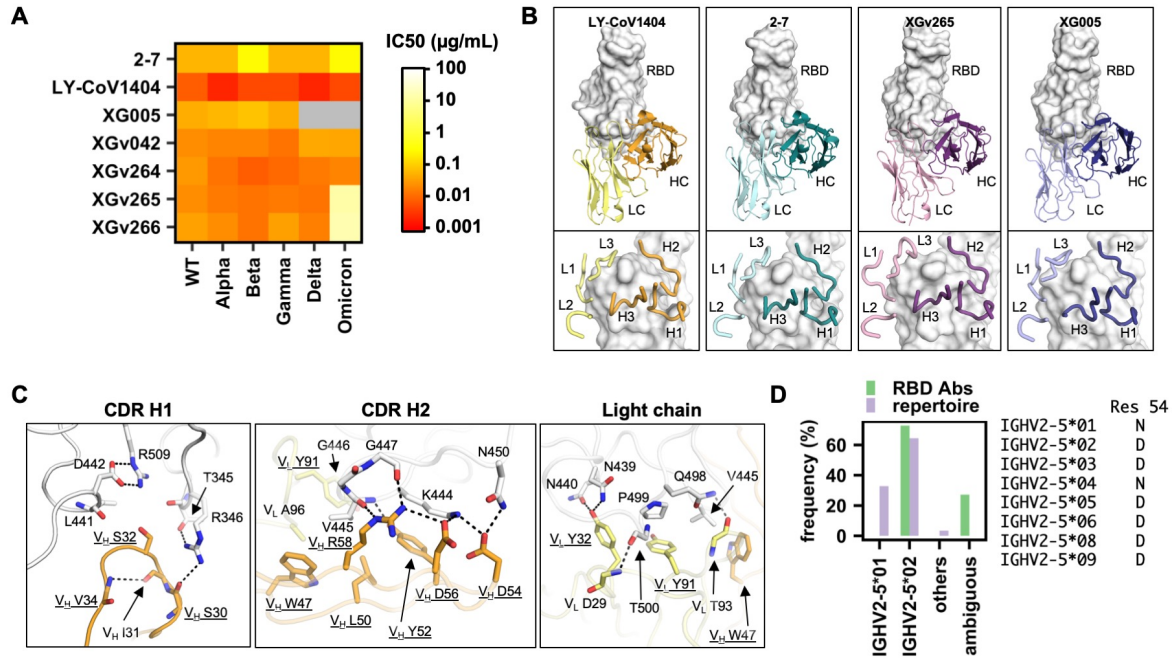

304

305 **Figure 1. IGHV2-5/IGLV2-14 is a public antibody response with strong allelic preference.**

306 **(A)** The half maximal inhibitory concentration ( $IC_{50}$ ) of IGHV2-5/IGLV2-14-encoded RBD  
 307 antibodies against different SARS-CoV-2 VOCs in pseudovirus assays. Data were taken from  
 308 previous studies [7, 18-20]. **(B)** Four IGHV2-5/IGLV2-14-encoded RBD antibodies have structure  
 309 information available. Their binding modes to RBD (white surface) are compared. Upper panels:  
 310 heavy chain (HC) and light chain (LC) of each antibody are shown. Bottom panels: zoom-in views  
 311 with six CDR loops of each antibody shown. LY-CoV1404: PDB 7MMO [7]. 2-7: PDB 7LSS [21].  
 312 XGv265: PDB 7WEE [18]. XG005: PDB 7V26 [20]. **(C)** Key interactions between LY-CoV1404  
 313 and RBD are shown. Hydrogen bonds and salt bridges are represented by black dashed lines. All  
 314 germline-encoded residues are underlined. Heavy chain is in orange, light chain in yellow, and  
 315 RBD is in white. **(D)** IGHV allele usage of the 11 IGHV2-5/IGLV2-14-encoded RBD antibodies  
 316 (RBD Abs) is compared with that of IGHV2-5-encoded antibodies in published repertoire  
 317 sequencing datasets from 13 healthy donors [22, 23]. The amino-acid identity at residue 54 of  
 318 each IGHV2-5 allele is indicated.

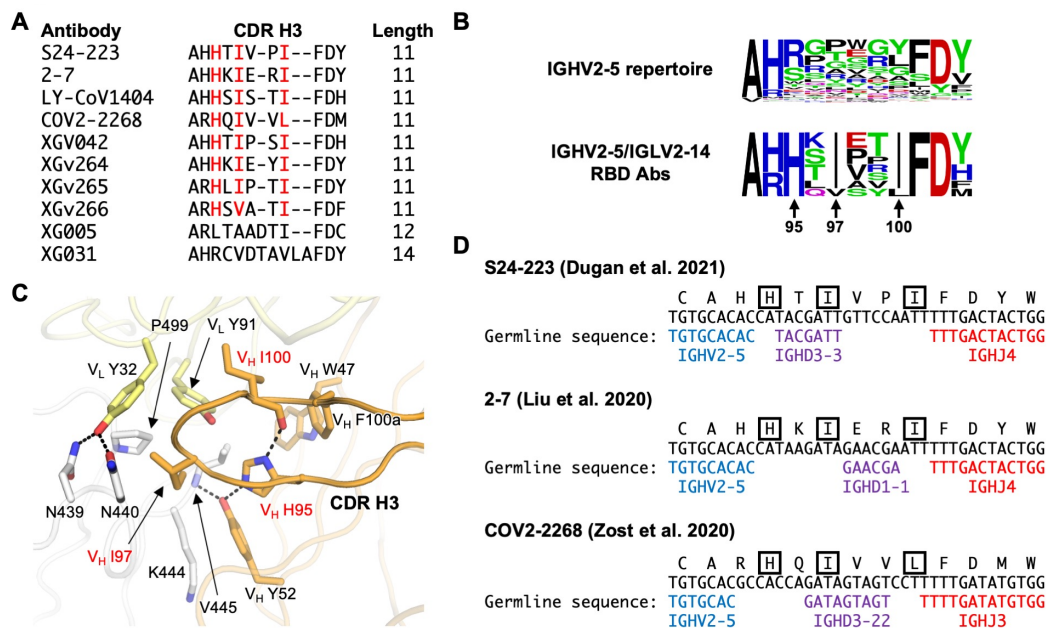

319

320 **Figure 2. HxLxxI is a common motif in IGHV2-5/IGLV2-14-encoded RBD antibodies. (A)** CDR  
321 H3 sequences (IMGT numbering) from IGHV2-5/IGLV2-14-encoded RBD antibodies are aligned.  
322 Residues of interest are highlighted in red. **(B)** CDR H3 sequences (IMGT numbering) of IGHV2-  
323 5/IGLV2-14-encoded RBD antibodies and IGHV2-5-encoded antibodies in the human antibody  
324 repertoire are shown as sequence logos. Only those antibodies with a CDR H3 length of 11 amino  
325 acids are included in this analysis. Residues of interest are labeled. Sequences of IGHV2-5-  
326 encoded antibodies in the human antibody repertoire were downloaded from the Observed  
327 Antibody Space [41]. A total of 9,197 IGHV2-5-encoded antibodies in the human antibody  
328 repertoire were analyzed here. Of note, while Kabat numbering was used for the residue position,  
329 IMGT numbering was used for defining CDR H3 length. **(C)** Interaction between the CDR H3 of  
330 LY-CoV1404 and RBD is shown. PDB 7MMO [7]. Hydrogen bonds are represented by black  
331 dashed lines. Heavy chain is in orange, light chain in yellow, and RBD is in white. Residues of  
332 interest are highlighted in red. **(D)** Amino-acid and nucleotide sequences of the V-D-J junction of  
333 three IGHV2-5/IGLV2-14-encoded RBD antibodies are shown. Putative germline sequences and  
334 segments are indicated. Residues of interest are boxed.



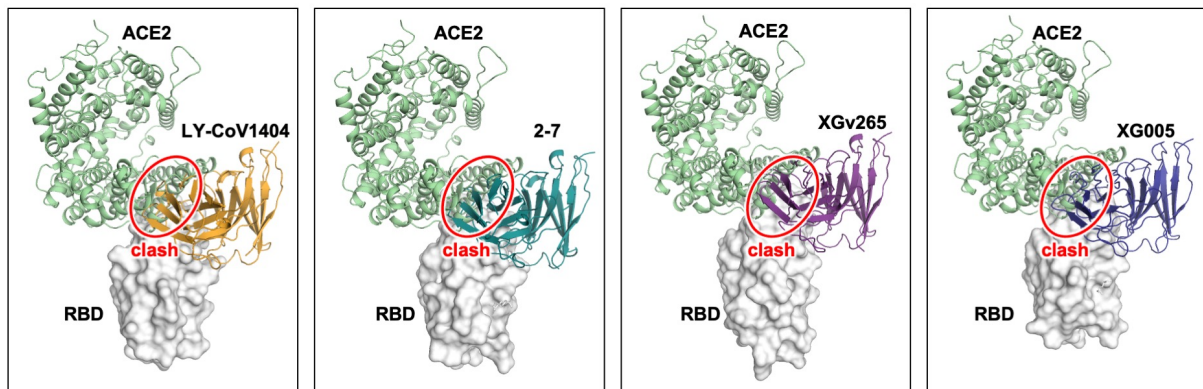

335  
336 **Figure S1. IGHV2-5/IGLV2-14 antibodies would clash with ACE2 binding.** Structures of  
337 antibody/RBD complexes are superimposed onto the RBD/ACE2 complex structure (PDB 6M0J)  
338 [43]. RBD is represented by a white surface. ACE2 is shown as green cartoon. LY-CoV1404: PDB  
339 7MMO [7]. 2-7: PDB 7LSS [21]. XGv265: PDB 7WEE [18]. XG005: PDB 7V26 [20].

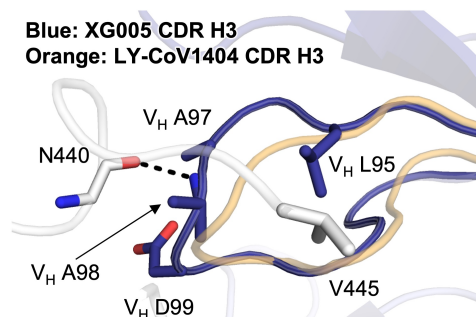

340  
341 **Figure S2. Interactions between RBD and CDR H3 of XG005.** A cryo-EM structure of SARS-  
342 CoV-2 spike protein in complex with XG005 (PDB 7V26) that was reported in a previous study  
343 [20] is shown. A hydrogen bond between XG005 and the RBD is represented by a black dashed  
344 line. The CDR H3 of LY-CoV1404 (PDB 7MMO) [7] is also shown here as a transparent orange  
345 cartoon to demonstrate the relative positions of the CDR H3 loops from these two antibodies after  
346 superimposition.
